# Supplementary material for: Estimated Maternal Pesticide Exposure from Drinking Water and Heart Defects in Offspring
Source: PubMed Central journal article supplement (PMC5580593; doi:10.3390/ijerph14080889), 2017-08-08
Supplement: ijerph-14-00889-s001.pdf [file ijerph-14-00889-s001.pdf]

## Supplementary Materials: Estimated Maternal Pesticide Exposure from Drinking Water and Heart Defects in Offspring

Jihye Kim, Michael D. Swartz, Peter H. Langlois, Paul A. Romitti, Peter Weyer, Laura E. Mitchell, Thomas J. Luben, Anushuya Ramakrishnan, Sadia Malik, Philip J. Lupo, Marcia L. Feldkamp, Robert E. Meyer, Jennifer J. Winston, Jennita Reefhuis, Sarah J. Blossom, Erin Bell, and A. J. Agopian \* and the National Birth Defects Prevention Study

**Table S1.** Descriptive characteristics of cases and controls with available atrazine data, NBDPS <sup>a</sup>, 1999–2005.

| Characteristics <sup>b</sup> | Cases |       | Controls |       | <i>p</i> -Value <sup>c</sup> |
|------------------------------|-------|-------|----------|-------|------------------------------|
|                              | N     | %     | N        | %     |                              |
| Characteristics <sup>b</sup> | 1620  | 100.0 | 1335     | 100.0 |                              |
| State                        |       |       |          |       | < 0.001                      |
| Arkansas                     | 540   | 33.3  | 349      | 26.1  |                              |
| Iowa                         | 475   | 29.3  | 442      | 33.1  |                              |
| North Carolina               | 196   | 12.1  | 228      | 17.1  |                              |
| Utah                         | 409   | 25.3  | 316      | 23.7  |                              |
| Delivery year                |       |       |          |       | 0.001                        |
| 1999 <sup>d</sup>            | 138   | 8.5   | 66       | 4.9   |                              |
| 2000 <sup>d</sup>            | 126   | 7.8   | 137      | 10.3  |                              |
| 2001 <sup>d</sup>            | 122   | 7.5   | 107      | 8.0   |                              |
| 2002 <sup>d</sup>            | 147   | 9.1   | 104      | 7.8   |                              |
| 2003                         | 365   | 22.5  | 330      | 24.7  |                              |
| 2004                         | 382   | 23.6  | 328      | 24.6  |                              |
| 2005                         | 340   | 21.0  | 263      | 19.7  |                              |
| Infant sex                   |       |       |          |       | 0.213                        |
| Male                         | 851   | 52.6  | 671      | 50.3  |                              |
| Female                       | 768   | 47.4  | 664      | 49.7  |                              |
| Plurality of pregnancy       |       |       |          |       | <0.001                       |
| Yes                          | 102   | 6.3   | 34       | 2.6   |                              |
| No                           | 1517  | 93.7  | 1300     | 97.5  |                              |

|                                                 |      |      |      |      |       |
|-------------------------------------------------|------|------|------|------|-------|
| Previous live birth                             |      |      |      |      | 0.611 |
| Yes                                             | 968  | 59.8 | 810  | 60.7 |       |
| No                                              | 652  | 40.3 | 525  | 39.3 |       |
| Maternal age                                    |      |      |      |      | 0.006 |
| <20                                             | 142  | 8.8  | 123  | 9.2  |       |
| 20–24                                           | 438  | 27.0 | 382  | 28.6 |       |
| 25–29                                           | 497  | 30.7 | 400  | 30.0 |       |
| 30–34                                           | 352  | 21.7 | 287  | 21.5 |       |
| 35–39                                           | 148  | 9.1  | 133  | 10.0 |       |
| ≥40                                             | 43   | 2.7  | 10   | 0.8  |       |
| Maternal race/ethnicity                         |      |      |      |      | 0.783 |
| Non-Hispanic White                              | 1232 | 76.2 | 1012 | 76.2 |       |
| Non-Hispanic Black                              | 174  | 10.8 | 135  | 10.2 |       |
| Hispanic                                        | 118  | 7.3  | 109  | 8.2  |       |
| Other                                           | 92   | 5.7  | 73   | 5.5  |       |
| Mother's education                              |      |      |      |      | 0.429 |
| Less than high school                           | 218  | 13.5 | 174  | 13.1 |       |
| High school                                     | 454  | 28.1 | 349  | 26.2 |       |
| Greater than high school                        | 946  | 58.5 | 810  | 60.8 |       |
| Household income                                |      |      |      |      | 0.708 |
| <\$10,000                                       | 244  | 15.7 | 187  | 14.6 |       |
| \$10,000–\$50,000                               | 418  | 26.9 | 354  | 27.7 |       |
| >\$50,000                                       | 894  | 57.5 | 736  | 57.6 |       |
| Mother's birthplace in U.S.                     |      |      |      |      | 0.069 |
| Yes                                             | 1461 | 90.3 | 1176 | 88.2 |       |
| No                                              | 157  | 9.7  | 157  | 11.8 |       |
| Cigarette smoking during pregnancy              |      |      |      |      | 0.749 |
| Yes                                             | 378  | 23.4 | 305  | 22.9 |       |
| No                                              | 1240 | 76.6 | 1029 | 77.1 |       |
| Maternal gestational or pregestational diabetes |      |      |      |      | 0.004 |
| Yes                                             | 176  | 10.9 | 103  | 7.7  |       |

|                                               |      |      |       |       |
|-----------------------------------------------|------|------|-------|-------|
| No                                            | 1441 | 89.1 | 1,230 | 92.3  |
| Water district population size                |      |      |       | 0.001 |
| < 5000                                        | 235  | 14.5 | 208   | 15.6  |
| 5000–200,000                                  | 1051 | 65.0 | 922   | 69.1  |
| > 200,000                                     | 332  | 20.5 | 205   | 15.4  |
| Periconceptual Folic acid intake <sup>e</sup> |      |      |       | 0.609 |
| Yes                                           | 895  | 55.3 | 725   | 54.3  |
| No                                            | 725  | 44.8 | 610   | 45.7  |

NBDPS, National Birth Defects Prevention Study; <sup>a</sup> Included NBDPS data from Arkansas, Iowa, North Carolina, and Utah; <sup>b</sup> Some characteristic counts do not sum to the totals due to missing data; <sup>c</sup> Estimated using chi-square test; <sup>d</sup> Data from North Carolina and Iowa were not available for deliveries in 1999–2002; <sup>e</sup> Between 1 month before pregnancy and 1st month of pregnancy.

**Table S2.** Descriptive characteristics of all potential controls with and without atrazine data in NBDPS <sup>a</sup>, 1999–2005.

| Characteristic <sup>b</sup> | Atrazine Data |       | Missing Atrazine Data |       | OR (95% CI)        | p-Value <sup>c</sup> |
|-----------------------------|---------------|-------|-----------------------|-------|--------------------|----------------------|
|                             | N             | %     | N                     | %     |                    |                      |
| State                       | 1335          | 100.0 | 322                   | 100.0 |                    | <0.001               |
| Arkansas                    | 349           | 26.1  | 174                   | 54.0  | 15.76 (8.18–30.34) |                      |
| Iowa                        | 442           | 33.1  | 82                    | 25.5  | 5.86 (2.99–11.48)  |                      |
| North Carolina              | 228           | 17.1  | 56                    | 17.4  | 7.76 (3.88–15.54)  |                      |
| Utah                        | 316           | 23.7  | 10                    | 3.1   | Ref.               |                      |
| Delivery year               |               |       |                       |       |                    | <0.001               |
| 1999 <sup>d</sup>           | 66            | 4.9   | 17                    | 5.3   | Ref.               |                      |
| 2000 <sup>d</sup>           | 137           | 10.3  | 53                    | 16.5  | 1.50 (0.81–2.79)   |                      |
| 2001 <sup>d</sup>           | 107           | 8.0   | 34                    | 10.6  | 1.23 (0.64–2.38)   |                      |
| 2002 <sup>d</sup>           | 104           | 7.8   | 34                    | 10.6  | 1.27 (0.66–2.45)   |                      |
| 2003                        | 330           | 24.7  | 53                    | 16.5  | 0.62 (0.34–1.14)   |                      |
| 2004                        | 328           | 24.6  | 54                    | 16.8  | 0.64 (0.35–1.17)   |                      |
| 2005                        | 263           | 19.7  | 77                    | 23.9  | 1.14 (0.63–2.05)   |                      |
| Infant sex                  |               |       |                       |       |                    | 0.829                |
| Male                        | 671           | 50.3  | 164                   | 50.9  | Ref.               |                      |

|                                    |      |      |     |      |                  |       |
|------------------------------------|------|------|-----|------|------------------|-------|
| Female                             | 664  | 49.7 | 158 | 49.1 | 0.97 (0.76–1.24) |       |
| Plurality of pregnancy             |      |      |     |      |                  | 0.577 |
| Yes                                | 34   | 2.6  | 10  | 3.1  | 1.23 (0.60–2.51) |       |
| No                                 | 1300 | 97.5 | 312 | 96.9 | Ref.             |       |
| Previous live birth                |      |      |     |      |                  | 0.655 |
| Yes                                | 810  | 60.7 | 191 | 59.3 | 0.95 (0.74–1.21) |       |
| No                                 | 525  | 39.3 | 131 | 40.7 | Ref.             |       |
| Maternal age                       |      |      |     |      |                  | 0.001 |
| <20                                | 123  | 9.2  | 35  | 10.9 | 1.13 (0.73–1.74) |       |
| 20–24                              | 382  | 28.6 | 62  | 19.3 | 0.64 (0.46–0.91) |       |
| 25–29                              | 400  | 30.0 | 101 | 31.4 | Ref.             |       |
| 30–34                              | 287  | 21.5 | 87  | 27.0 | 1.20 (0.87–1.66) |       |
| 35–39                              | 133  | 10.0 | 29  | 9.0  | 0.86 (0.55–1.36) |       |
| ≥40                                | 10   | 0.8  | 8   | 2.5  | 3.17 (1.22–8.23) |       |
| Maternal race/ethnicity            |      |      |     |      |                  | 0.682 |
| Non-Hispanic White                 | 1012 | 76.2 | 238 | 74.4 | Ref.             |       |
| Non-Hispanic Black                 | 135  | 10.2 | 40  | 12.5 | 1.26 (0.86–1.84) |       |
| Hispanic                           | 109  | 8.2  | 25  | 7.8  | 0.98 (0.62–1.54) |       |
| Other                              | 73   | 5.5  | 17  | 5.3  | 0.99 (0.57–1.71) |       |
| Mother’s education                 |      |      |     |      |                  | 0.606 |
| Less than high school              | 174  | 13.1 | 47  | 14.6 | 1.22 (0.82–1.84) |       |
| High school                        | 349  | 26.2 | 77  | 23.9 | Ref.             |       |
| Greater than high school           | 810  | 60.8 | 198 | 61.5 | 1.11 (0.83–1.48) |       |
| Household income                   |      |      |     |      |                  | 0.001 |
| <\$10,000                          | 187  | 14.6 | 45  | 15.1 | 1.27 (0.88–1.85) |       |
| \$10,000–\$50,000                  | 354  | 27.7 | 115 | 38.5 | 1.72 (0.30–2.27) |       |
| >\$50,000                          | 736  | 57.6 | 139 | 46.5 | Ref.             |       |
| Mother’s birthplace in U.S.        |      |      |     |      |                  | 0.764 |
| Yes                                | 1176 | 88.2 | 286 | 88.8 | Ref.             |       |
| No                                 | 157  | 11.8 | 36  | 11.2 | 0.94 (0.64–1.39) |       |
| Cigarette smoking during pregnancy |      |      |     |      |                  | 0.162 |

|                                                 |      |      |     |      |                  |
|-------------------------------------------------|------|------|-----|------|------------------|
| Yes                                             | 305  | 22.9 | 62  | 19.3 | 0.81 (0.59–1.09) |
| No                                              | 1029 | 77.1 | 260 | 80.8 | Ref.             |
| Maternal gestational or pregestational diabetes |      |      |     |      | 0.006            |
| Yes                                             | 103  | 7.7  | 11  | 3.4  | 0.42 (0.22–0.80) |
| No                                              | 1230 | 92.3 | 311 | 96.6 | Ref.             |
| Water district population size                  |      |      |     |      | <0.001           |
| < 5000                                          | 208  | 15.6 | 85  | 28.4 | Ref.             |
| 5000–200,000                                    | 922  | 69.1 | 214 | 71.6 | 0.57 (0.42–0.76) |
| >200,000                                        | 205  | 15.4 | 0   | 0.0  | NA               |
| Periconceptional Folic acid intake <sup>e</sup> |      |      |     |      | 0.187            |
| Yes                                             | 725  | 54.3 | 188 | 58.4 | 1.18 (0.92–1.51) |
| No                                              | 610  | 45.7 | 134 | 41.6 | Ref.             |

NBDPS, National Birth Defects Prevention Study; OR, (crude) odds ratio for missing atrazine; CI, confidence interval; NA, not applicable; <sup>a</sup> Included NBDPS data from Arkansas, Iowa, North Carolina, and Utah; <sup>b</sup> Some characteristic counts do not sum to the totals due to missing data; <sup>c</sup> Estimated using chi-square test; <sup>d</sup> Data from North Carolina and Iowa were not available for deliveries in 1999–2002; <sup>e</sup> Between 1 month before pregnancy and 1st month of pregnancy.

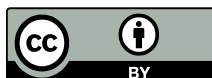

© 2017 by the authors; licensee MDPI, Basel, Switzerland. This article is an open access article distributed under the terms and conditions of the Creative Commons by Attribution (CC-BY) license (<http://creativecommons.org/licenses/by/4.0/>).
